# Supplementary material for: Razonamiento y Vigilancia Epistémica: Una Explicación Relevantista de los Evidencialespor lo vistoyse ve que
Source: publisher site journal article supplement (doi:10.1515/soprag-2019-0003), 2019-06-01
Supplement: Supplementary file 1 [file Supplimentary Material...Datos.docx]

Carolina Figueras Bates

Faculty of Philology

University of Barcelona

Gran Via de les Corts Catalanes, 585

08007 Barcelona

e-mail: figueras@ub.edu

**Carolina Figueras Bates** is associate professor of Spanish Philology at the University of Barcelona. She is author of the book entitled *Pragmática de la puntuación* (Barcelona, Octaedro, 2001), and the editor, with Adrián Cabedo, of *Perspectives on Evidentiality in Spanish: Explorations across Genres* (Amsterdam, John Benjamins, 2018). Her research interests are focused on linguistic evidentiality, its relation with mitigation and appraisal, speech acts and argumentation, and the construction of epistemic stance in non-solicited illness narratives.

**Resumen:** En el presente estudio se aborda la descripción de la semántica de los marcadores evidenciales *por lo visto* y *se ve que* en el marco de la teoría de la relevancia (TR). Tomando como punto de partida el análisis que Albelda (2018) traza de ambos evidenciales en un corpus oral, se realizó tanto un estudio cuantitativo como cualitativo de los patrones y el rango de interpretaciones de cada evidencial en una muestra de géneros escritos formales procedentes del *Corpus de Referencia del Español Actual* (CREA). Los resultados cuantitativos mostraron algunas diferencias con respecto a los obtenidos por Albelda (2018): *por lo visto* es principalmente inferencial y, en menor medida, reportativo en la escritura formal. En contraste con los géneros orales, tiende a introducir inferencias genéricas, y en ocasiones también precede conjeturas. Se alinea con el parámetro de la objetividad, permitiendo al emisor mostrar una menor implicación hacia la evidencia, así como un mayor compromiso epistémico hacia la fiabilidad de la información. *Se ve que*, por el contrario, es generalmente un marcador inferencial, tanto en géneros escritos como orales. Se emplea, principalmente, para encabezar inferencias conjeturales. Con *se ve que*, el emisor muestra una mayor implicación y subjetivización, y un menor compromiso epistémico hacia la evidencia que se introduce en el discurso. Los diferentes patrones de comportamiento discursivo exhibidos por ambos evidenciales pueden explicarse en el marco de la teoría argumentativa del razonamiento. *Por lo visto* y *se ve que* tienden a introducir, respectivamente, conclusiones intuitivas y reflexivas que deben ser verificadas y aceptadas por la audiencia. *Se ve que* apunta, generalmente, a la activación de los mecanismos cognitivos de vigilancia epistémica y lectura de la mente, mientras que *por lo visto* tiende a desencadenar los procesos de vigilancia epistémica y de razonamiento.

**Palabras clave**: compromiso epistémico del hablante, evidencia reportativa, evidencia inferencial, argumentación, razonamiento, vigilancia epistémica, lectura de la mente

**Abstract:** The aim of the present study is to describe the semantics of the evidential markers *por lo visto* and *se ve que* in the framework of relevance theory. Taking as a point of departure Albelda’s (2018) analysis of these two evidentials on an oral corpus, a sample of formal written discursive genres was selected from *Corpus de Referencia del Español Actual* (CREA). Quantitative and qualitative methods of analysis of the patterns and range of interpretations of each evidential were conducted. The quantitative results revealed some differences from Albelda’s (2018) findings: *por lo visto* is mainly used to introduce inferential evidence and, to a lesser extent, reportative evidence in formal writing. In contrast to oral genres, *por lo visto* tends to bring out generic inferences, and sometimes it precedes conjectures. *Por lo visto* aligns with objectivity, allowing the speaker to show less involvement towards the evidence, and expresses a higher epistemic commitment toward the reliability of the evidence. *Se ve que*, instead, is generally an inferential marker, both in written and oral genres. It ismostly deployed to introduce conjectures. With *se ve que*, the speaker shows more involvement and subjectivation, and a weaker epistemic commitment toward the evidence introduced in discourse. The different patterns of discursive behaviour shown by these two evidentials can be accounted for within the realm of the argumentative theory of reasoning. *Por lo visto* and *se ve que* tend to introduce, respectively, intuitive and reflective conclusions to be verified and accepted by the audience. *Se ve que* generally points to activating the cognitive mechanisms of epistemic vigilance and theory of mind, whereas *por lo visto* triggers the processes of epistemic vigilance and reasoning in interaction.

**Keywords**: speaker´s epistemic commitment, reportative evidence, inferential evidence, argumentation, reasoning, epistemic vigilance, mindreading

The author assumes the complete responsibility for the present study.
